Urol Int 2021;105:1128  
DOI: 10.1159/000519186

Published online: September 2, 2021

In the article by Carando et al. entitled “Intravesical Treatment with Electro-Mediated Administration of Mytomicin C as Prophylaxis for Intermediate and High-Risk Nonmuscle-Invasive Bladder Cancer: A Retrospective Multicenter Study” [Urol Int. 2019;103:285–90, DOI: 10.1159/000502663], the word “Mytomicin” in the title should correctly read “Mitomycin.”
